# Supplementary material
Source: Springer Nature journal article supplement (https://www.springermedizin.de/resource/supplementary/12943_2005_134_MOESM1_ESM.pdf/9553556)

(A) *BRAF* V600E mutation screening using F-SSCP

WT M M M WT WT WT M WT

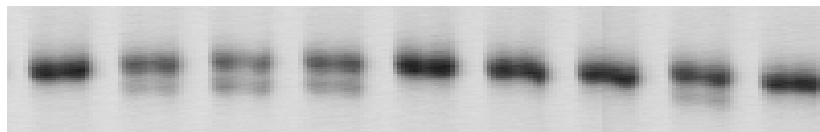

(B) DNA sequence showing *BRAF* 1799T to A mutation

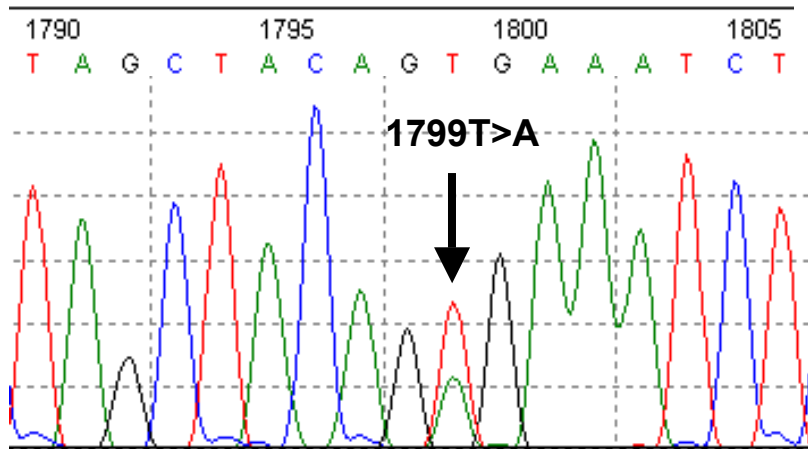

Supplement: MOESM1 [file 9553556]
